# Supplementary material
Source: PubMed Central journal article supplement (PMC3207103)
Supplement: embor2011178s1.pdf [file embor2011178s1.pdf]

## Supplementary File: Materials and Methods

### Supplementary Figure Legends

**Fig. S1.** Transposition efficiency of EP-MS2 insertions in X chromosome. Seven EP-MS2 insertions on the first chromosome were mobilized and the frequency of new insertion events in the autosomes were scored to evaluate the transposition efficiency. The transposition efficiency (Y-axis) is expressed as percentage of red-eyed flies among 300 female progeny (which do not carry the original transgenic first chromosome).

**Fig. S2.** Crossing scheme for the screen. Following the strategy for EP-expression screens, the EP-MS2 construct on the first chromosome was mobilized by crossing males carrying a transposase-encoding construct (Delta2-3) to females carrying the EP element to be mobilized on the X chromosome. Transposition occurs in the heterozygous progeny. Males from this generation are crossed against *white*<sup>-</sup> females. Individual red-eyed male progeny from this cross are again crossed to *white*<sup>-</sup> females to establish lines (250 in our pilot screen) for screening. These males have lost the X chromosome carrying the original EP insertion and their red eye color therefore indicates new, transposed insertions on their second or third chromosomes. Males from the next generation of each of these lines are used for the diagnostic screening crosses. They are mated to females carrying the *btl-GAL4, UAS-MS2-GFP* chromosome (5 males, 10 females) and the progeny of this cross is analyzed at the third larval instar. At least 16 larvae from each cross are observed under a fluorescent dissecting microscope.

**Fig. S3.** A-B'' High resolution images of terminal cells expressing MCP-GFP and MS2 tagged mRNAs from the negative line EP-MS2-16. MCP-GFP is localized to the nucleus (A-A''). B-B'' are blowups of regions marked in A-A'' (white box). C-C''. In positive lines (here EP-MS2-94) MCP-GFP is seen distributed throughout the terminal cells (C'), including distal branches (D'). D-D'' are blowups of regions marked in C-C'' (white box). Red signal: auto-fluorescence from the tubes in terminal cells under excitation with 405nm. Scale bars: 10µm.

**Fig. S4.** Expression levels of ectopically expressed MS2 tagged RNAs.

A Schematic describing the positions of the primer in the inserted EP-MS2 construct (primer Pry2) and the reverse primer from the disrupted gene (gene specific primer). cDNA was synthesized from embryonic total RNA using oligo-dT and random hexamer primers. The forward PCR primer was designed to anneal in the 3' inverted repeat of the EP-MS2 insert (primer JP59/Pry2), the gene specific reverse primers were designed such that when used in combination with primer JP59/Pry2 they would result in amplicons in the range of 300-600bp. The list of gene specific primers is listed in supplementary table S2. B. RT-PCR products from embryo expressing transgenes in their tracheal system Four positive lines (EP-MS2-67: *btsz*; EP-MS2-18: *lola*; EP-MS2-53: *Hr39*; EP-MS2-193: CG30403) and three negative lines (EP-MS2-161: CG13985, EP-MS2-24: CG4455, EP-MS2-3: *bif*) were expressed in trachea together with UAS-GFP using *btl*-Gal4. RT-PCR for *rpl40* was carried out as an endogenous control, and RT-PCR of Gal4 as a control for the expression of the driver. *HmgD* was included as a negative control for a gene on the opposite strand of CG30403 (upstream of the direction of transcription). The genes located downstream of the EP insertion sites were all transcribed. CG13895 consistently showed a weaker band than the other genes.

**Fig. S5.** Validation of candidates.

A-C: Control fluorescent *in situ* hybridization for the experiment shown in Figure 3 with sense RNA probes for *srf*, *dof* and CG9924.

D: Outline of the tracheal cell shown in Figure 3B.

E,F: Terminal branches expressing cytoplasmic GFP (E,F; green in E", F") stained with antibodies against ATPalpha (E) and Dof (F). Both ATPalpha and Dof are found in terminal branches distant from the nucleus.

F: Expression of MS2-GFP in ovaries. Confocal image of two ovarioles, each containing several egg chambers of different stages of oogenesis expressing a UAS-MS2-GFP transgene under the control of nanos-GAL4-V16-GAL4 driver. The same transgenic line was used in our study. For visualisation of GFP, ovaries were dissected, fixed and mounted (no anti-GFP antibody staining was used). GFP is strongly detectable in the nurse cell nuclei and, to a lower extent, in the oocyte nucleus. GFP expression starts in the germarium and is continuous during all stages of oogenesis. Scale bars: E,F=10µm.



**Supplementary Table S1: Insertion sites of mapped transposons**

| Insertion line, cell type | Targeted gene (distance not indicated if at transcription start)    | 30nt of genomic sequence at insertion site (sequenced from 3' or 5' primer) |
|---------------------------|---------------------------------------------------------------------|-----------------------------------------------------------------------------|
| <b><i>Trachea</i></b>     |                                                                     |                                                                             |
| EP-MS2-12                 | Within transposable element Doc; many copies in the genome          | 5' ATGCATACTTTTCTTTTCGTCTCACCGCAA                                           |
| EP-MS2-18                 | <i>lola</i>                                                         | 3' GCTCAGTCACCGTCACATTTGCGTCGTTTC                                           |
| EP-MS2-47                 | <i>Hsp70Aa</i>                                                      | 3' TATTGCTCTCTCACTCTGATCACACAGGAA                                           |
| EP-MS2-53                 | <i>hr39</i>                                                         | 5' ATGGGGCAGACAGAGAAGAGAGATGGTGAG                                           |
| EP-MS2-67                 | <i>btsz</i> , internal                                              | 5' CGCTATTTCTCGTCTTTTGTGCTGCGAAAG<br>3' GCAACATCGCCAGGGAAGTGGCTTCGC         |
| EP-MS2-94                 | <i>btsz</i> , internal                                              | 5' CGCTATTTCTCGTCTTTTGTGCTGCGAAAG                                           |
| EP-MS2-128                | <i>roadkill</i> , intron                                            | 5' ATGAAAACAAAAGTAGTACACGCTGCCGGC                                           |
| EP-MS2-131                | <i>Atp-alpha</i>                                                    | 5' AGATGTTACACCGCAGCCTAACGCTCTCAT                                           |
| EP-MS2-154                | no PCR product                                                      |                                                                             |
| EP-MS2-193                | CG30403*                                                            | 5' GGAGAGAACTCTTACTCTCTCACCAATCC<br>3' CGCTAAGCAGGGAAAATGCGTTTTGCACAA       |
| EP-MS2-207                | 5 <i>btsz</i> internal                                              | 5' CGCTATTTCTCGTCTTTTGTGCTGCGAAAG                                           |
| <b><i>Neurons</i></b>     |                                                                     |                                                                             |
| EP-MS2-16                 | CG5715                                                              | 3' TTCCCATAAATCAAGAAGCCGGCGGATAG                                            |
| <b><i>Oocytes</i></b>     |                                                                     |                                                                             |
| EP-MS2-152a               | <i>cenG1a</i>                                                       | 5' ACTTGGGGGATGATGACGCAAAGAGAGCA                                            |
| <b><i>Negative</i></b>    |                                                                     |                                                                             |
| EP-MS2-3                  | <i>bif</i> , internal                                               | 3' AACCAAACAAAATGGCCAGCACCGACATCT                                           |
| EP-MS2-9                  | no gene in correct orientation nearby. cDNA BT022231 8kb downstream | 5' GGCCAAGGAATGTTCAATGACTCAACCAGT                                           |
| EP-MS2-17                 | <i>Tre</i> (800bp)                                                  | 5' TCGGTTAGTTAAGTTGGCTTAGTTGGCCCAA                                          |
| EP-MS2-21                 | <i>Hel89B</i>                                                       | 5' GGCCTGACTATCGTGGTGCATCGGTTTTTAG                                          |
| EP-MS2-24                 | CG4455                                                              | 5' CTGCGGGACATTTTTAATTTATTTTGAATTT<br>3' GAACAATCGAAGGGGTTACAAGGCCACGG      |
| EP-MS2-28                 | <i>UbcD4</i>                                                        | 5' TGCATTTCGGATAATTCTGAAAGCTCGCCTAT                                         |
| EP-MS2-51                 | no gene in correct orientation nearby. CG7879 is 17kb downstream    | 3' ATCGAGTGGAAGTGGGAGAGAGAGAACCT                                            |
| EP-MS2-135                | <i>CHKov1</i>                                                       | 5' ACTCGCAACATATTAGTGGCGTAGTTGTCA                                           |
| EP-MS2-143                | no gene in correct orientation nearby. CG13288 is 6kb downstream    | 5' TATTTTCATCATGATCGGAAACCACAACACA                                          |
| EP-MS2-161                | CG13895, second intron                                              | 3' TTTGTAAATATACATACATAAATATGTATAA                                          |
| EP-MS2-187                | no gene in correct orientation nearby. dumpy 4kb downstream         | 5' CGTTTCACTCAATTTAAGTGACTGCTCACG                                           |

## Legend supplementary Table S1

The insertion sites of the EP-MS2 vector were mapped by inverse PCR (<http://www.fruitfly.org/about/methods/inverse.pcr>). The gene listed as targeted gene is the one that is closest to the insertion site in the direction of transcription of the EP-element. The sequence obtained from the flanking regions of insert EP-MS2-12 matched a large number of sites in the genome, which were annotated as ‘Doc natural transposon’, and we were unable to deduce from our sequence data into which of these the P-element had inserted. The PCR reaction with genomic DNA from line EP-MS2-154 did not yield a product, perhaps because the construct was damaged during insertion and had lost at least one of the sites to which the primers anneal. Lines 67, 94 and 207 may be of clonal origin, since their insertion points were precisely at the same nucleotide. Line EP-MS2-152 had two insertions which were subsequently crossed out into two separate stocks. Only the insertion that gave a positive signal in the oocyte is listed here.

\* EP-MS2-193 is inserted 1.7kb upstream of the predicted start site of CG30403. However, our RT-PCR data (Fig. S2) show that there is another exon further upstream, in the immediate vicinity of the integration site. RT-PCR between the MS2 motif and a sequence 1.7kb downstream of the integration site within the first *predicted* exon of CG30403 yields a PCR fragment of ca. 450 bp.

**Supplementary Table S2: Reagents and stocks**

| <b>Primers used for RT-PCR experiments</b> |           |                                  |
|--------------------------------------------|-----------|----------------------------------|
| <i>btsz</i>                                | btszCT-F  | GAGTTCGCCATGCAGTACAA             |
|                                            | btszCT-R  | TCGAGGAGCTGCCTGTTATT             |
| CG30403                                    | JP79      | GTCTCCGATCTTGGGCACGG             |
|                                            | JP81      | CAGTCCGGGATCAATGCTGA             |
| <i>hr39</i>                                | JP84      | ATTCTCGCCATTGGACGAGAG            |
|                                            | JP86      | GAAATCATGGATGTAGAGCA             |
| EP-MS2-67                                  | JP59/Pry2 | CTTGCCGACGGGACCACCTTATGTTATT     |
| <i>btsz</i>                                | JP40      | CTGGTCGGGTCTTTGTGTCT             |
| EP-MS2-18                                  | JP59/Pry2 | CTTGCCGACGGGACCACCTTATGTTATT     |
| <i>lola</i>                                | JP45      | AGCACTGCAAAGGTTGGTTT             |
| EP-MS2-53                                  | JP59/Pry2 | CTTGCCGACGGGACCACCTTATGTTATT     |
| <i>Hr39</i>                                | JP46      | GTTCGGTGACGGTAGTTCGT             |
| EP-MS2-193                                 | JP59/Pry2 | CTTGCCGACGGGACCACCTTATGTTATT     |
| CG30403                                    | JP75      | CTGAATTCGCCGATAGGC               |
| EP-MS2-161                                 | JP59/Pry2 | CTTGCCGACGGGACCACCTTATGTTATT     |
| CG13985                                    | JP54      | CGCTGTGGAGGTAAAACCTGG            |
| EP-MS2-24                                  | JP59/Pry2 | CTTGCCGACGGGACCACCTTATGTTATT     |
| CG4455                                     | JP56      | GAGGCAGAGAACGATTACGG             |
| EP-MS2-3                                   | JP59/Pry2 | CTTGCCGACGGGACCACCTTATGTTATT     |
| <i>bif</i>                                 | JP48      | TGCAGCTTTTGTGTTATCG              |
| EP-MS2-193                                 | JP59/Pry2 | CTTGCCGACGGGACCACCTTATGTTATT     |
| <i>HmgD</i>                                | JP42      | TAGTCGTCCTTGGCCTTAGC             |
| Gal4                                       | JP67      | GGTCTTCGAGTCAGGTTCCA             |
|                                            | JP68      | CGTCGACAGAAGAAGGGAAG             |
| Rpl49                                      | RPL49-for | TCCTACCAGCTTCAAGATGACC           |
|                                            | RPL49-rev | CACGTTGTGCACCAGGAACT             |
| <b>Primers used for cloning</b>            |           |                                  |
| eGFP primer1                               |           | GCAGCGGCCCGCAGTGAGCAAGGGCGAGGAGC |
| eGFP primer2                               |           | CGTCTAGATTACTTGTACAGCTCGTCCATGCC |
| <b>Fly Stocks</b>                          |           |                                  |
| <b>Fly Stocks</b>                          |           | <b>Source</b>                    |
| P{w[+mC]= <i>btl</i> -Gal4}                |           | Ref (1)                          |
| <i>nanos</i> -GAL4::VP16                   |           | Ref (2)                          |
| GAL4 <sup>4-77</sup> , UAS-mCD8::GFP       |           | Ref (3)                          |
| UAS-MCP-RFP                                |           | Ref (4)                          |
| UAS-Fng-ADD-myc                            |           | Ref (5)                          |
| UAS-KDEL-GFP                               |           | Bloomington, 9899                |
| <i>Hsp70Aa</i> -RNAi                       |           | VDRC, 31366                      |
| <i>lola</i> -RNAi                          |           | VDRC, 12052                      |

|                                      |                          |
|--------------------------------------|--------------------------|
| CG9924-RNAi                          | VDRC, 28798              |
| CG30403-RNAi                         | VDRC, 19223              |
| <i>ATPalpha</i> -RNAi                | VDRC, 12330              |
| <i>btsz</i> -RNAi                    | VDRC, 102608             |
| <i>Hr39</i> -RNAi                    | VDRC, 37695              |
|                                      |                          |
| <b>Antibodies and other reagents</b> | <b>Source</b>            |
| rabbit anti-Pac (1:500)              | S. F. Newbury; ref (6)   |
| rabbit anti-Dof (1:200)              | Ref (1)                  |
| rabbit anti-cMyc (1:100)             | Santa Cruz Biotechnology |
| rabbit anti-GFP (1:500)              | Torrey Pines Biolabs Inc |
| rabbit anti-Dcp1 (1:200)             | Tze-Bin Chou; ref (7)    |
| anti-mouse BicD (1:200)              | DSHB                     |
| mouse anti-ATPalpha (1:100)          | DSHB                     |
| Alexa- secondary antibodies (1:500)  | Invitrogen               |
| DAPI and Hoechst                     | Sigma                    |
| Alexa488-TSA (TSA kit # 22, T2 0932) | Invitrogen               |

## References

1. Vincent S, Wilson R, Coelho C, Affolter M, & Leptin M (1998) The Drosophila protein Dof is specifically required for FGF signaling. *Mol Cell* 2:515-525.
2. Van Doren M, Williamson AL, & Lehmann R (1998) Regulation of zygotic gene expression in Drosophila primordial germ cells. *Curr Biol* 8:243-246.
3. Grueber WB, Jan LY, & Jan YN (2003) Different levels of the homeodomain protein cut regulate distinct dendrite branching patterns of Drosophila multidendritic neurons. *Cell* 112:805-818.
4. Brechbiel JL & Gavis ER (2008) Spatial regulation of nanos is required for its function in dendrite morphogenesis. *Curr Biol* 18:745-750.
5. Munro S & Freeman M (2000) The Notch signalling regulator Fringe acts in the Golgi apparatus and requires the glycosyltransferase signature motif Dx<sub>2</sub>D. *Current biology : CB* 10:813-820.
6. Till DD, *et al.* (1998) Identification and developmental expression of a 5'-3' exoribonuclease from Drosophila melanogaster. *Mechanisms of Development* 79:51-55.
7. Lin MD, Fan SJ, Hsu WS, & Chou TB (2006) Drosophila decapping protein 1, dDcp1, is a component of the oskar mRNP complex and directs its posterior localization in the oocyte. *Dev Cell* 10:601-613.

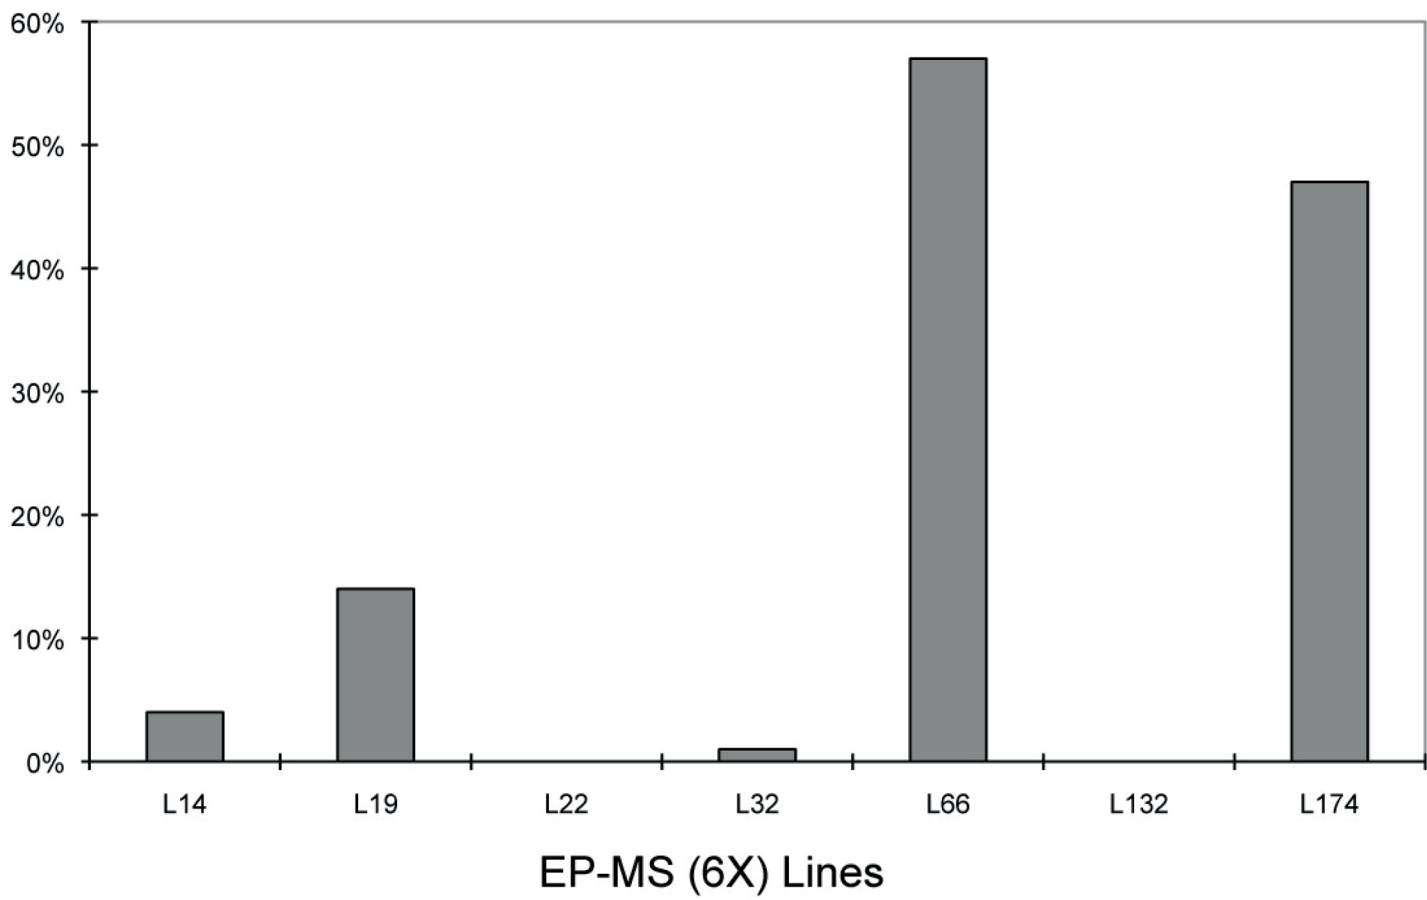

Figure S1

A

♂

♀

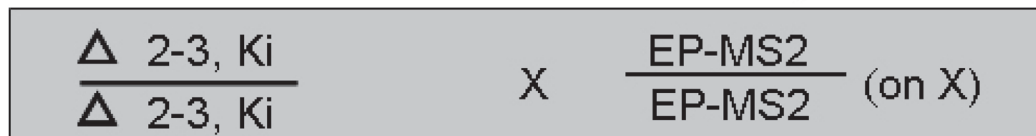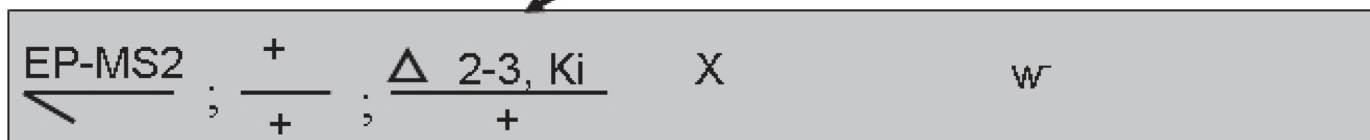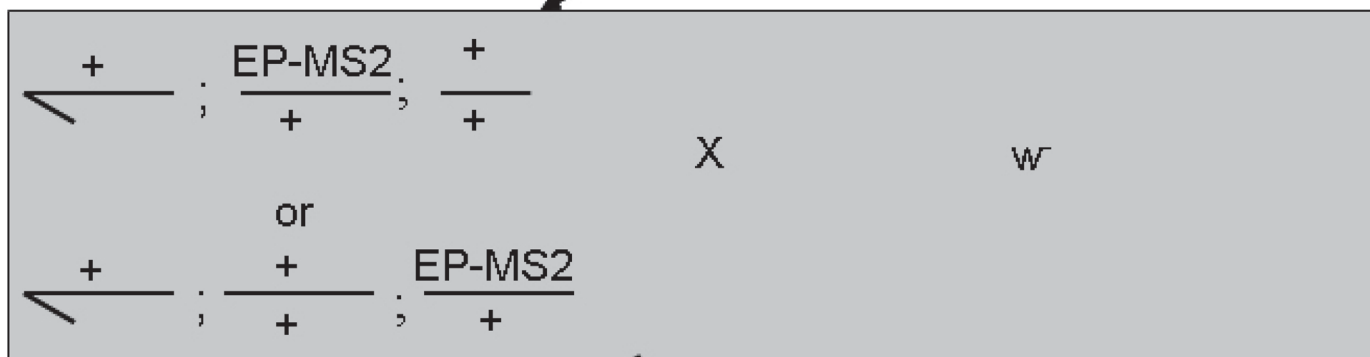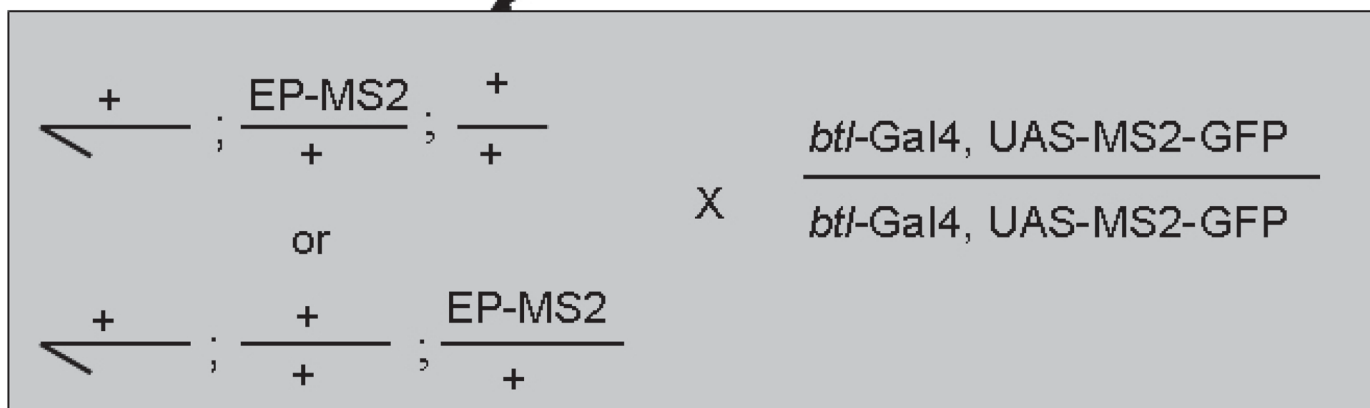

Figure S2

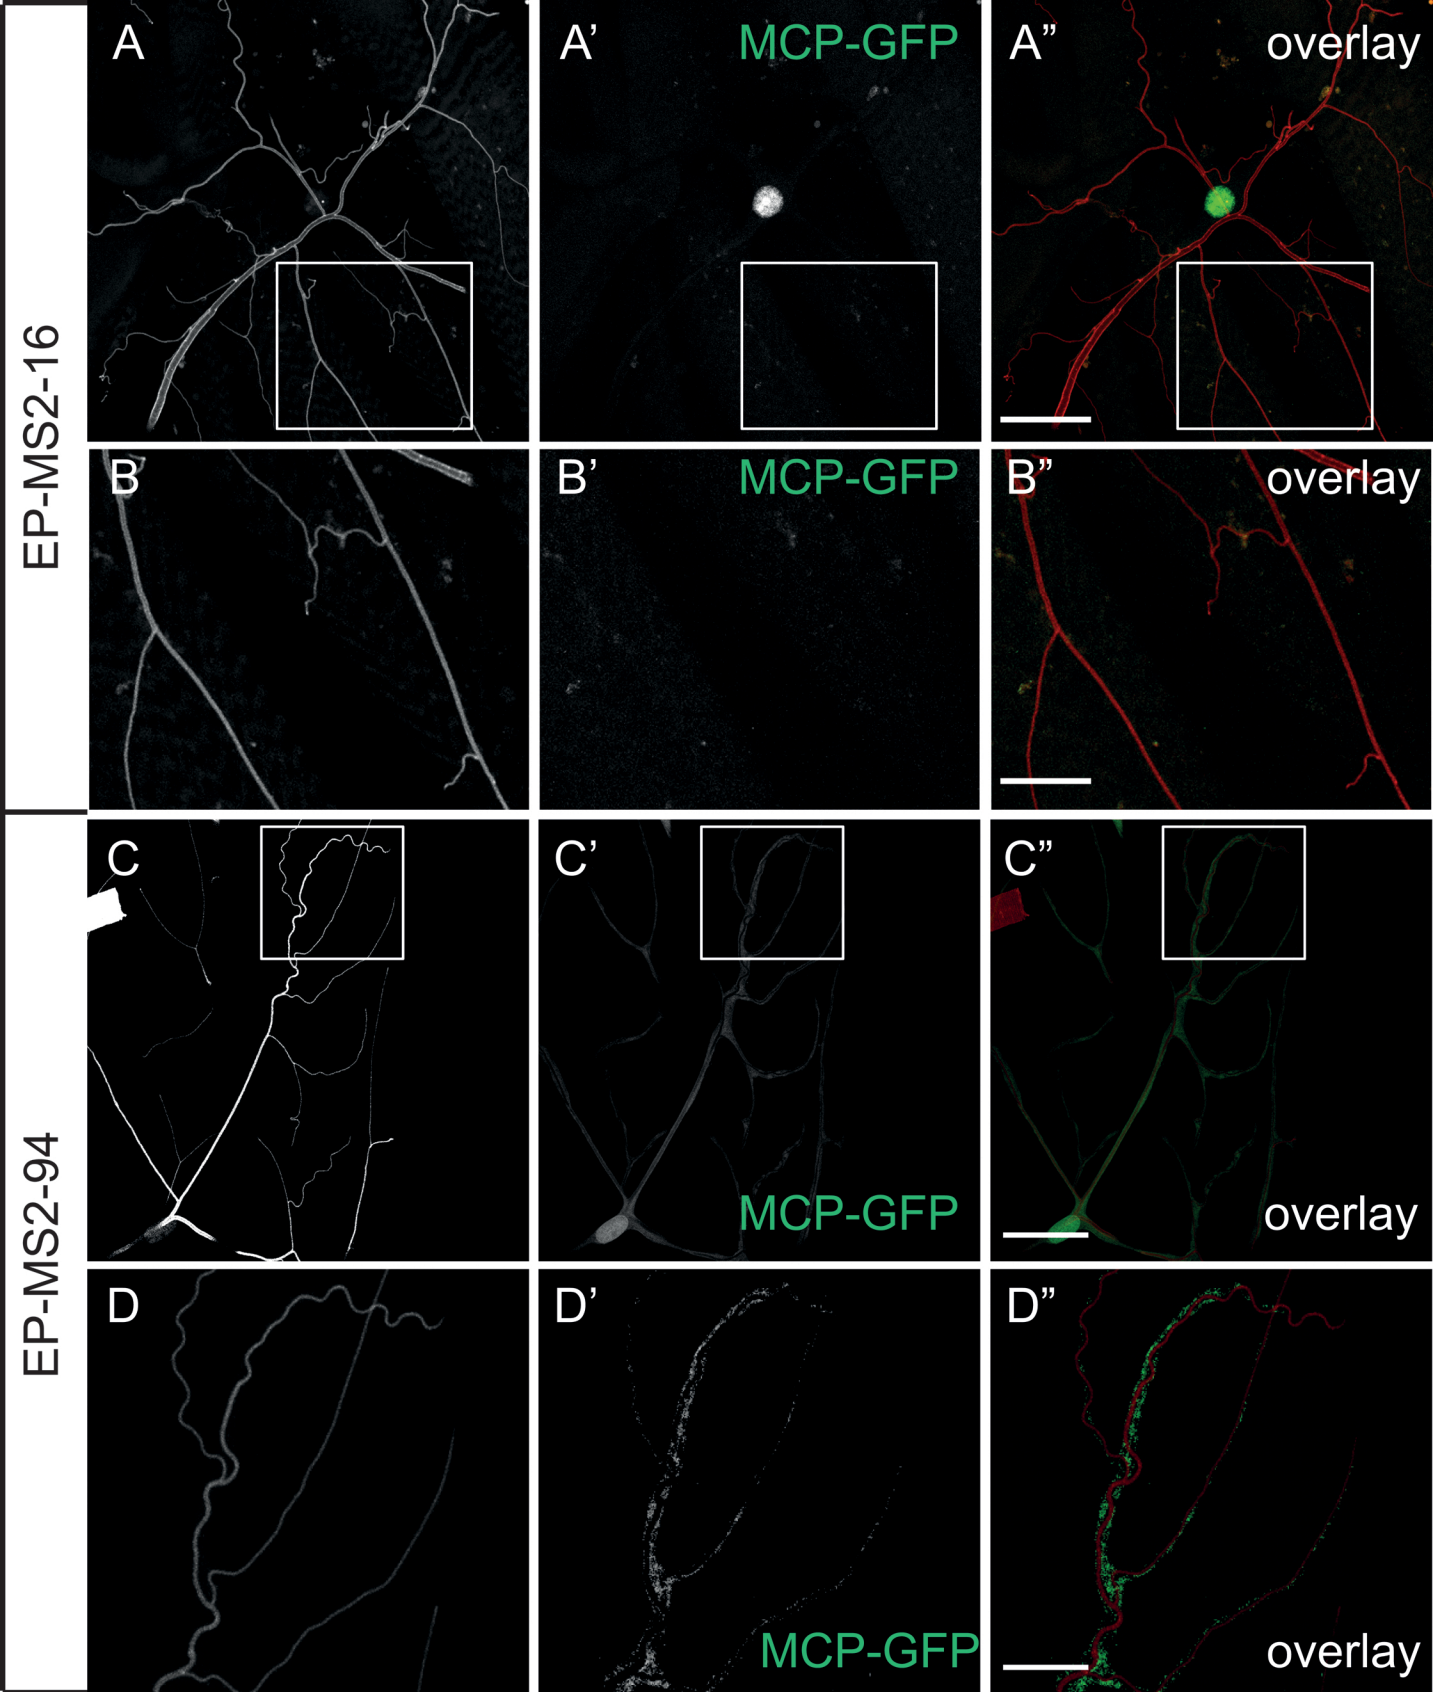

Figure S3



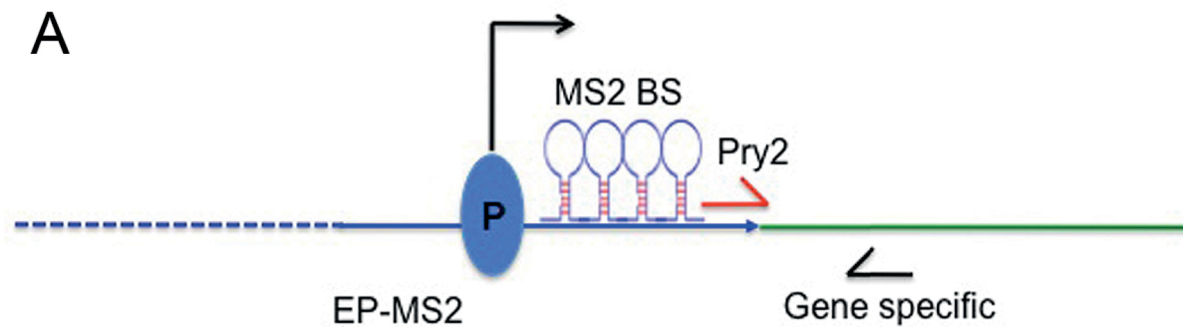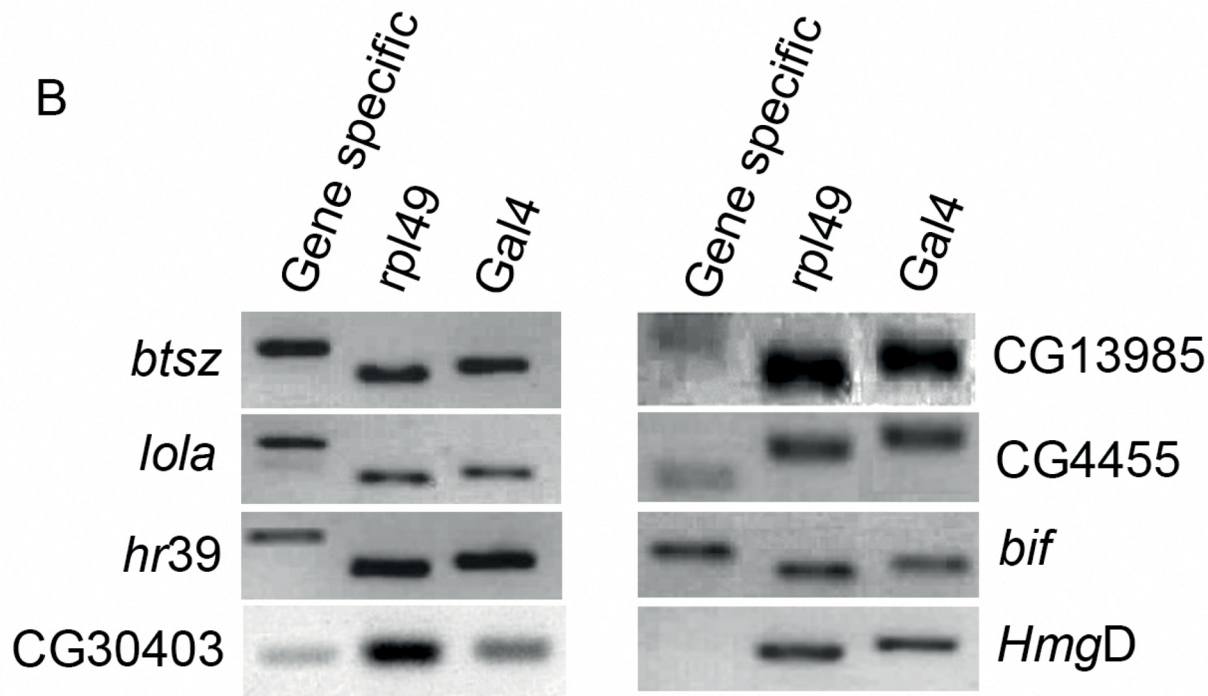

Figure S4

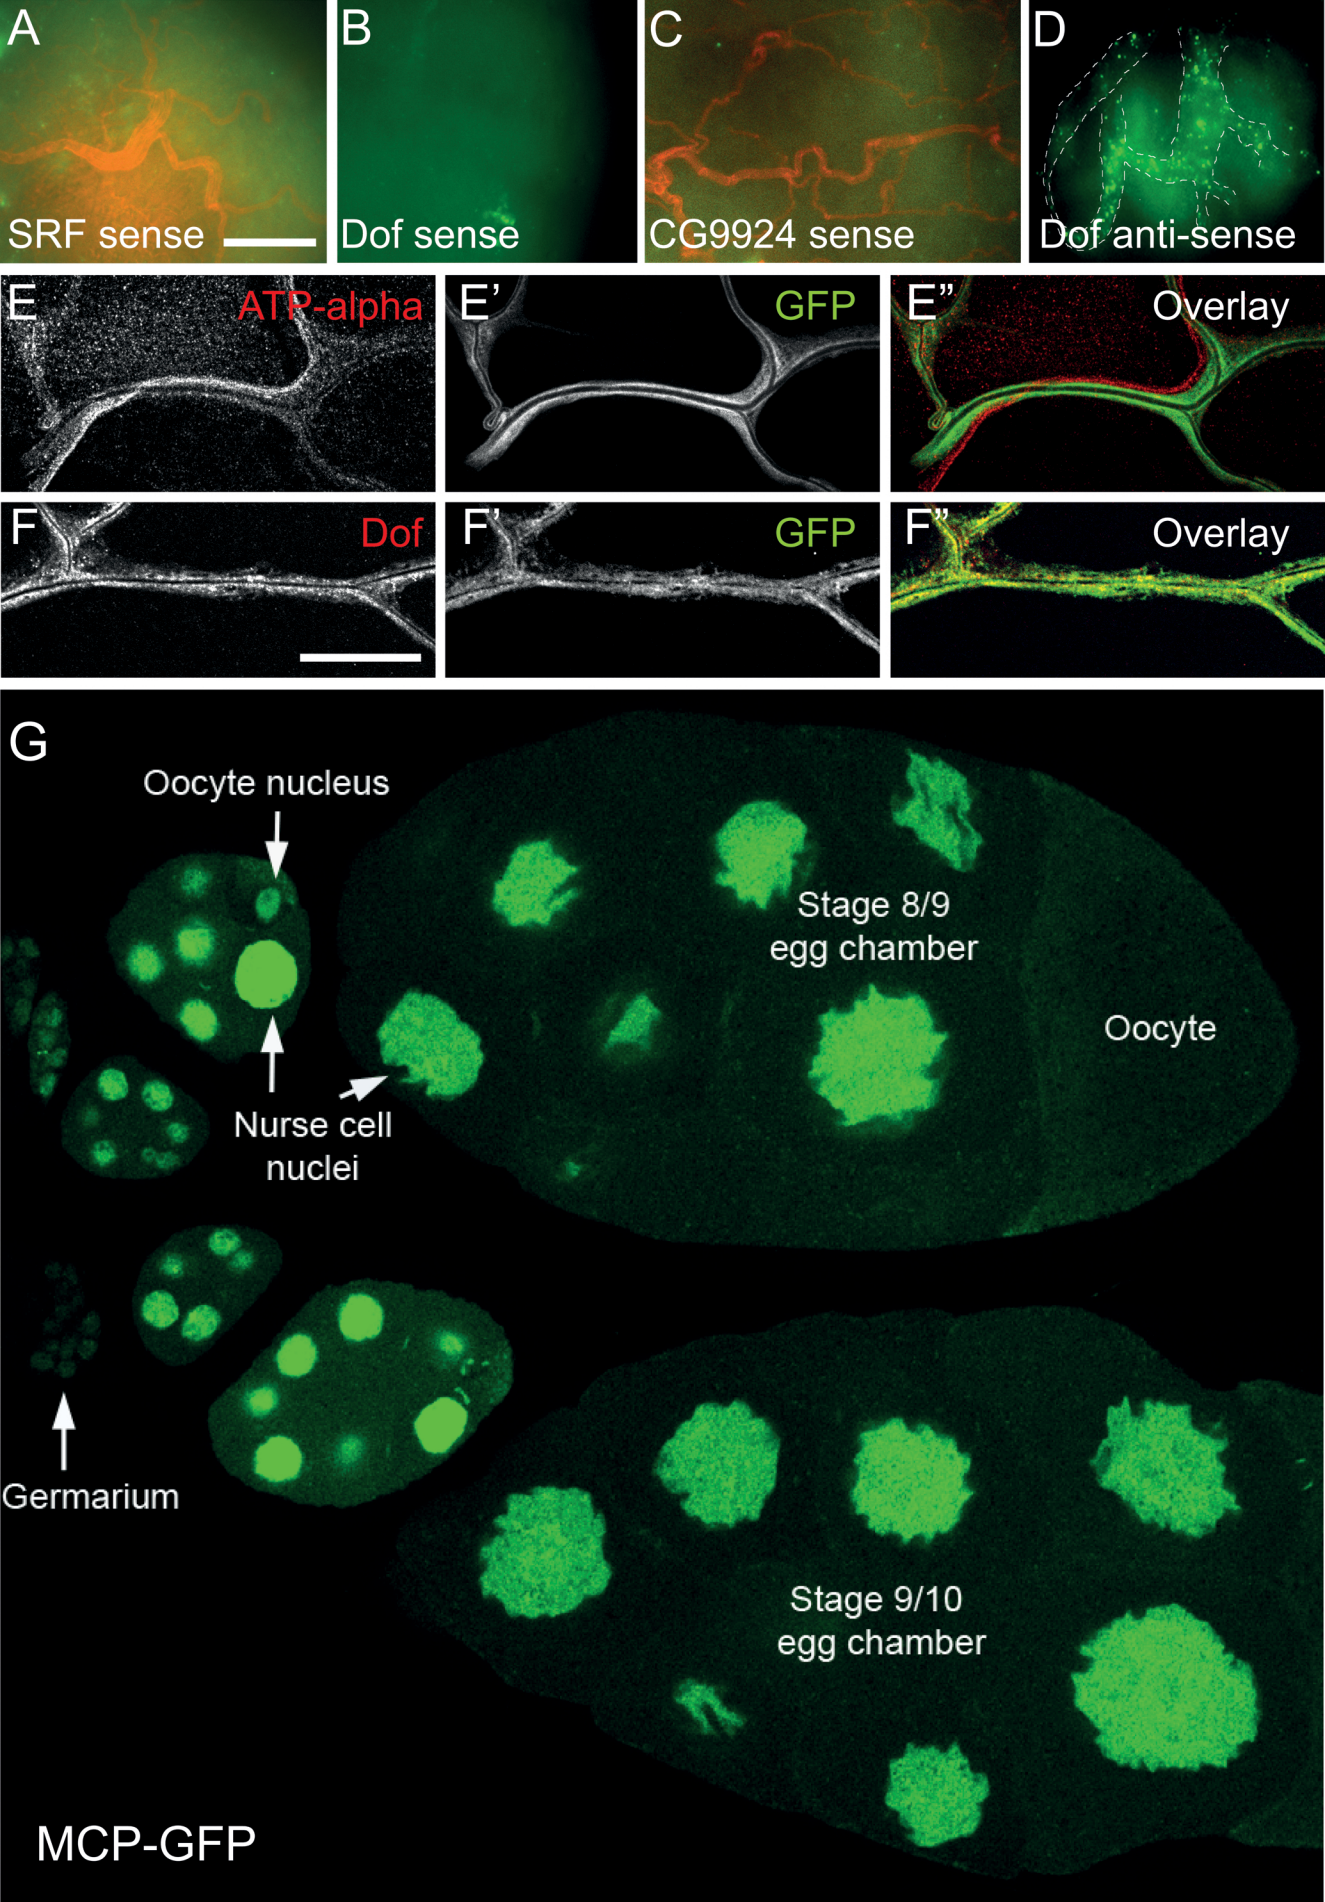

Figure S5
